# Supplementary material for: Fit-to-Flow (F2F) interconnects: Universal reversible adhesive-free microfluidic adaptors for lab-on-a-chip systems
Source: Royal Society of Chemistry journal article supplement (doi:10.1039/c0lc00384k), 2010-11-26
Supplement: c0lc00384k.pdf [file c0lc00384k.pdf]

**Electronic Supplementary Information for**

**Fit-to-Flow (F2F) Interconnects: Universal Reversible Adhesive-Free Microfluidic Adaptors for Lab-on-a-Chip Systems**

Arnold Chen and Tingrui Pan\*

Micro-Nano Innovations (MiNI) Laboratory, Department of Biomedical Engineering, University of California, Davis, CA, USA

**Figure S1.** Photograph of a spring-loaded syringe (of 3 mL) for manual vacuum generation. Three off-the-shelf stainless springs (of 13 mm in diameter and 17 mm in length with spring constant of 1.75 N/mm, Century Spring Corp.) are stacked on top of one another and coiled around the plunger to provide a volume depletion of 1.5 mL for adequate vacuum generation in the *vacuum-F2F* adaptor.
